# Supplementary material for: Use of Pulsed Electric Field as a Low-Temperature and High-Performance “Green” Extraction Technique for the Recovery of High Added Value Compounds from Olive Leaves
Source: MDPI journal article supplement (doi:10.3390/beverages7030045), 2021-07-01
Supplement: s1 [file s1]

# Use of Pulsed Electric Field as a Low-Temperature and High-Performance “Green” Extraction Technique for the Recovery of High Added Value Compounds from Olive Leaves

Vasileios M. Pappas <sup>1</sup>, Achillia Lakka <sup>1</sup>, Dimitrios Palaogiannis <sup>1</sup>, Eleni Bozinou <sup>1</sup>, George Ntourtoglou <sup>1</sup>, Georgia Batra <sup>1</sup>, Vassilis Athanasiadis <sup>1</sup>, Dimitris P. Makris <sup>1</sup>, Vassilis G. Dourtoglou <sup>2</sup> and Stavros I. Lalas <sup>1,\*</sup>

<sup>1</sup> Department of Food Science & Nutrition, University of Thessaly, Terma N. Temponera str., 43100 Karditsa, Greece; vpap@uth.gr (V.M.P.); achlakka@uth.gr (A.L.); dipaleog@med.uth.gr (D.P.); empozinou@uth.gr (E.B.); gntourtoglou@uniwa.gr (G.N.); gbatra@uth.gr (G.B.); vaathanasiadis@uth.gr (V.A.); dimitrismakris@uth.gr (D.P.M.)

<sup>2</sup> Department of Wine, Vine, & Beverage Sciences, School of Food Science, University of West Attica, Ag. Spyridonos str., 12243 Egaleo, Athens, Greece; vdourt@uniwa.gr

\* Correspondence: slalas@uth.gr

**Table S1.** Extraction conditions and PEF procedure parameters.

|                       | PEF 10 $\mu$ sec              | PEF 100 $\mu$ sec     | Control Samples       |
|-----------------------|-------------------------------|-----------------------|-----------------------|
| Extraction conditions | t Extraction (min)            | 30                    | 30                    |
|                       | T Extraction ( $^{\circ}$ C)  | 30                    | 30                    |
|                       | Extraction Chamber            | Rectangular           | Rectangular           |
| PEF Parameters        | t Pulse ( $\mu$ sec)          | 10                    | 100                   |
|                       | t Period ( $\mu$ sec)         | 1000                  | 1000                  |
|                       | V PEF Voltage Generator (kV)  | 1                     | 1                     |
|                       | Type of Pulse                 | Rectangular           | Rectangular           |
|                       | E PEF Field (kV/cm)           | 1                     | 1                     |
|                       | N Cycles                      | $1.8 \times 10^6$     | $1.8 \times 10^6$     |
|                       | t Total Pulse Duration (sec)  | $1.8 \times 10^1$     | $1.8 \times 10^2$     |
|                       | Specific Energy Input (kJ/kg) | 0.155                 | 1.55                  |
|                       | Total Energy Input (KWh)      | $2.52 \times 10^{-6}$ | $2.52 \times 10^{-5}$ |

\* Solvents tested were 0% up to 100% EtOH with a 25% step gradient.

**Table S2.** Averages (mg g<sup>-1</sup> dw) of major compounds of olive leaf PEF treated and control extracts, prepared with 25% ethanol.

| Pulse duration | Compound                 | PEF Treated Extract |      | Control Extract |      | Increase (%) |
|----------------|--------------------------|---------------------|------|-----------------|------|--------------|
|                |                          | Average             | SD   | Average         | SD   |              |
| 10 $\mu$ sec   | Peak 1                   | 0.13                | 0.01 | 0.08            | 0.01 | 49.53        |
|                | Quercetin-3-O-rutinoside | 0.24                | 0.04 | 0.07            | 0.00 | 265.67       |
|                | Peak 3                   | 0.21                | 0.00 | 0.13            | 0.01 | 57.32        |
|                | Luteolin-7-O-glucoside   | 0.82                | 0.02 | 0.48            | 0.02 | 71.87        |
|                | Apigenin-7-O-rutinoside  | 0.31                | 0.03 | 0.14            | 0.01 | 121.32       |
|                | Luteolin-3'-O-glucoside  | 0.29                | 0.01 | 0.20            | 0.01 | 41.76        |
|                | Oleuropein               | 0.63                | 0.19 | 0.58            | 0.06 | 9.22         |
|                | Peak 7                   | 0.06                | 0.01 | 0.04            | 0.00 | 56.84        |
| 100 $\mu$ sec  | Peak 1                   | 0.12                | 0.00 | 0.08            | 0.01 | 44.48        |
|                | Quercetin-3-O-rutinoside | 0.17                | 0.04 | 0.07            | 0.00 | 158.36       |
|                | Peak 3                   | 0.21                | 0.01 | 0.13            | 0.01 | 60.30        |
|                | Luteolin-7-O-glucoside   | 0.77                | 0.04 | 0.48            | 0.02 | 61.52        |
|                | Apigenin-7-O-rutinoside  | 0.27                | 0.02 | 0.14            | 0.01 | 91.94        |
|                | Luteolin-3'-O-glucoside  | 0.27                | 0.02 | 0.20            | 0.01 | 33.02        |
|                | Oleuropein               | 0.76                | 0.11 | 0.58            | 0.06 | 31.95        |
|                | Peak 7                   | 0.05                | 0.00 | 0.04            | 0.00 | 36.92        |

\* Luteolin-3'-O-glucoside as well as peaks 1, 3 and 7 were quantified as luteolin-7-O-glucoside. Apigenin-7-O-rutinoside was quantified as apigenin.

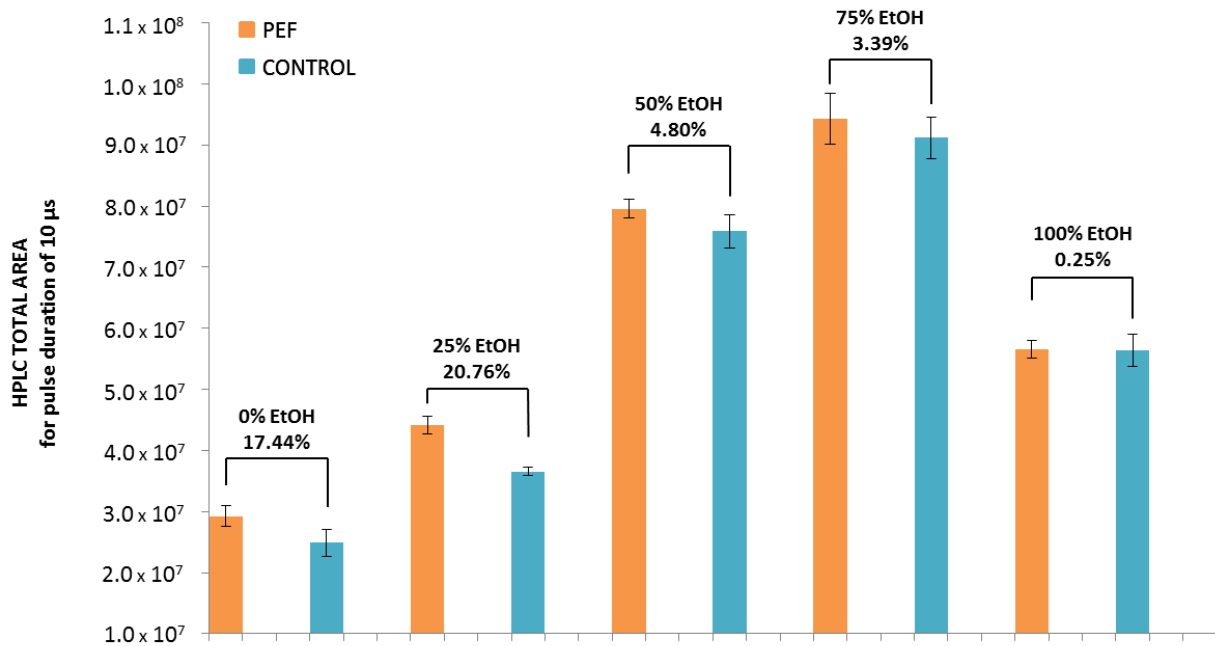

**Figure S1.** HPLC total area for PEF and Control samples in five different tested solvents and a pulse duration of 10  $\mu$ sec.

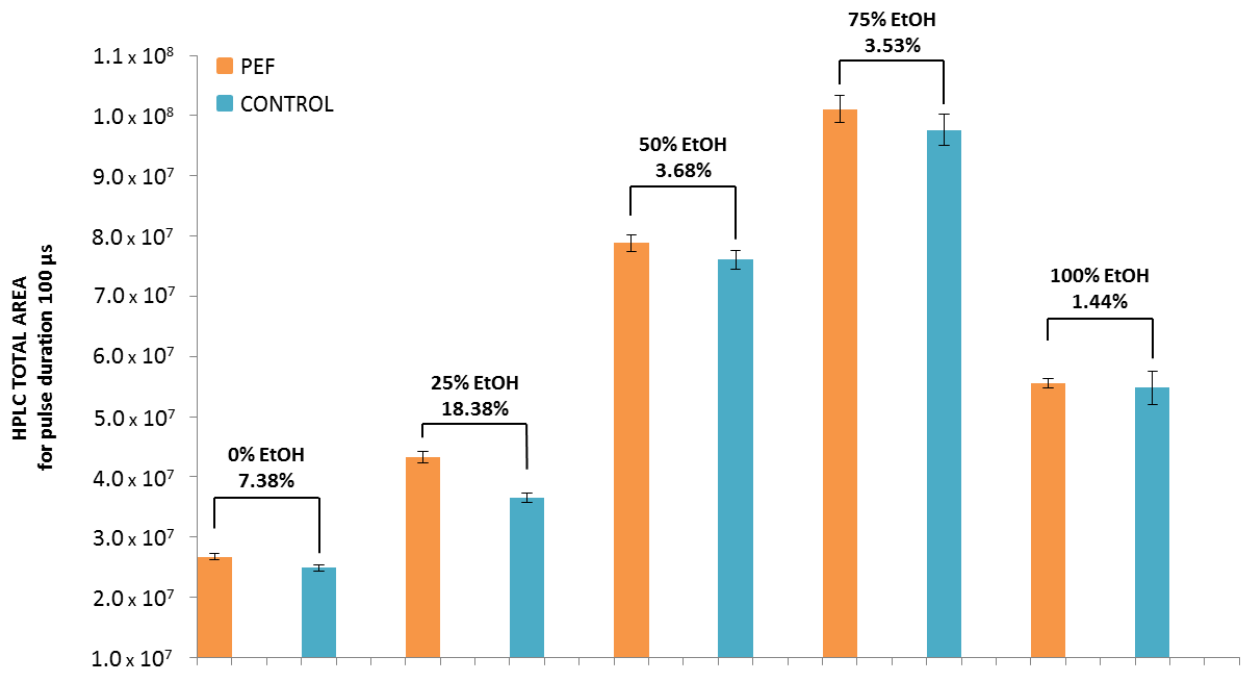

**Figure S2.** HPLC total area for PEF and Control samples in five different tested solvents and a pulse duration of 100μsec.

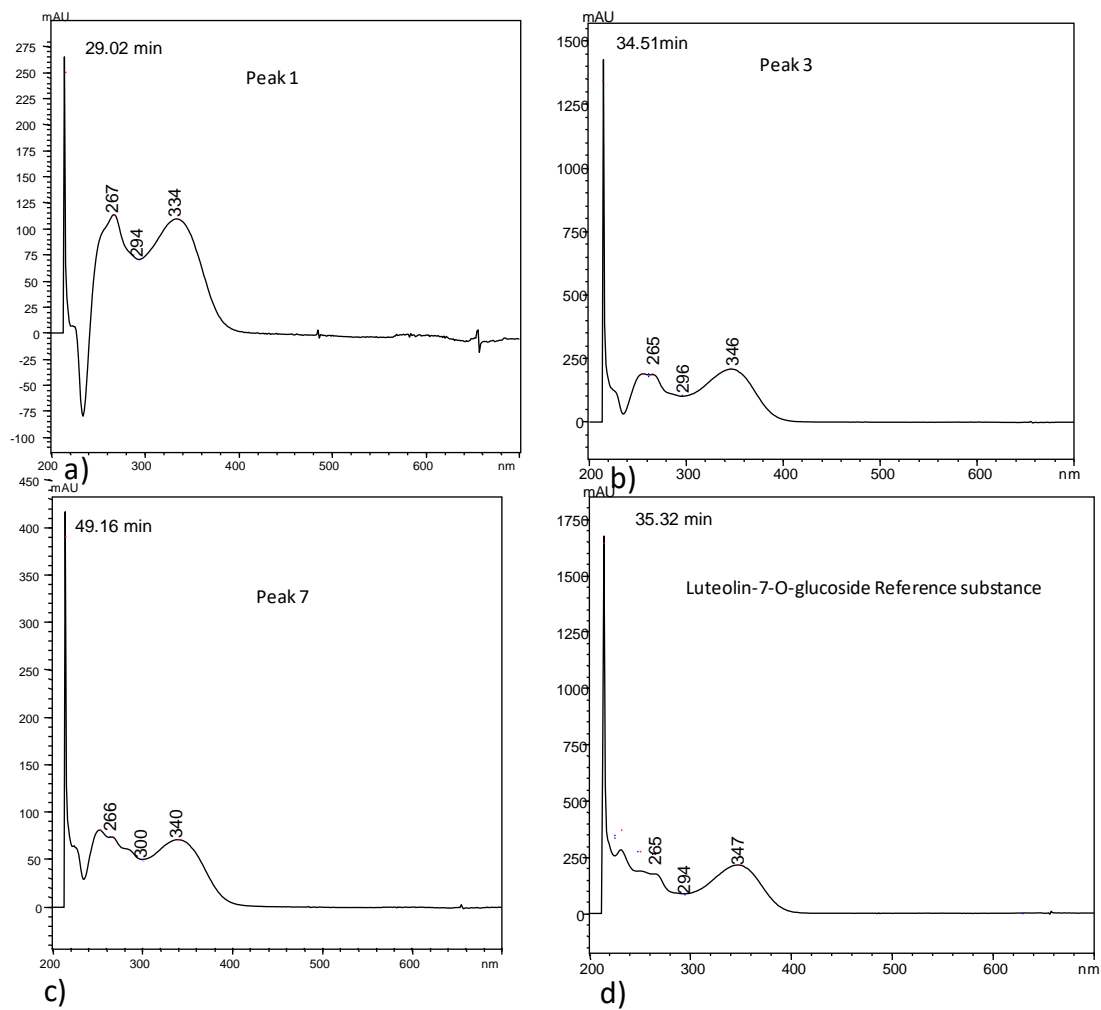

**Figure S3.** UV-Vis spectras obtained by HPLC-DAD analysis of a) peak 1, b) peak 3, c) peak 7 and d) Luteolin-7-O-glucoside reference substance.
